# Supplementary material for: Water-stable ammonium-terminated carbosilane dendrimers as efficient antibacterial agents
Source: Royal Society of Chemistry journal article supplement (doi:10.1039/b909955g), 2009-01-01
Supplement: b909955g.pdf [file b909955g.pdf]

## **Supporting Information**

### **Water-Stable Ammonium-Terminated Carbosilane Dendrimers as Efficient Antibacterial Agents**

**Beatriz Rasines,<sup>[a]</sup> José Manuel Hernández-Ros,<sup>[a]</sup> Natividad de las Cuevas,<sup>[b]</sup> José Luis Copa-Patiño,<sup>[c]</sup> Juan Soliveri,<sup>[c]</sup> M<sup>a</sup> Angeles Muñoz-Fernández,<sup>[b]</sup> Rafael Gómez,<sup>[a]</sup> and F. Javier de la Mata.<sup>[a]</sup>**

[a] Beatriz Rasines, Dr. J. M. Hernández-Ros, Dr. R. Gómez, Dr. F. J. De la Mata

Departamento de Química Inorgánica, Universidad de Alcalá, E-28871 Alcalá de Henares (Spain). Networking Research Center on Bioengineering, Biomaterials and Nanomedicine (CIBER-BBN), Spain.

FAX: (+34) 91 885 4683

E-mail: [javier.delamata@uah.es](mailto:javier.delamata@uah.es); [rafael.gomez@uah.es](mailto:rafael.gomez@uah.es);

[b] Dr. Natividad de las Cuevas, Dr. M. A. Muñoz-Fernández

Laboratorio de Inmunobiología Molecular, Hospital General Universitario Gregorio Marañón, Madrid (Spain). Networking Research Center on Bioengineering, Biomaterials and Nanomedicine (CIBER-BBN), Spain.

E-mail: [mmunoz@cbm.uam.es](mailto:mmunoz@cbm.uam.es)

[c] Dr. J. L. Copa-Patiño, Dr. J. Soliveri

Departamento de Microbiología y Parasitología, Universidad de Alcalá, E-28871 Alcalá de Henares (Spain).

E-mail: [josel.copa@uah.es](mailto:josel.copa@uah.es)

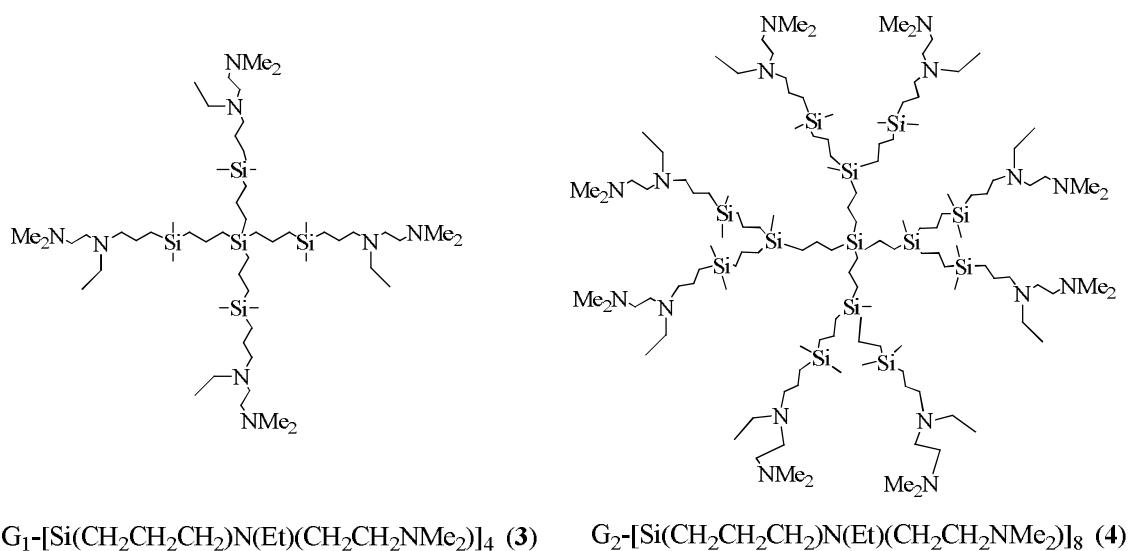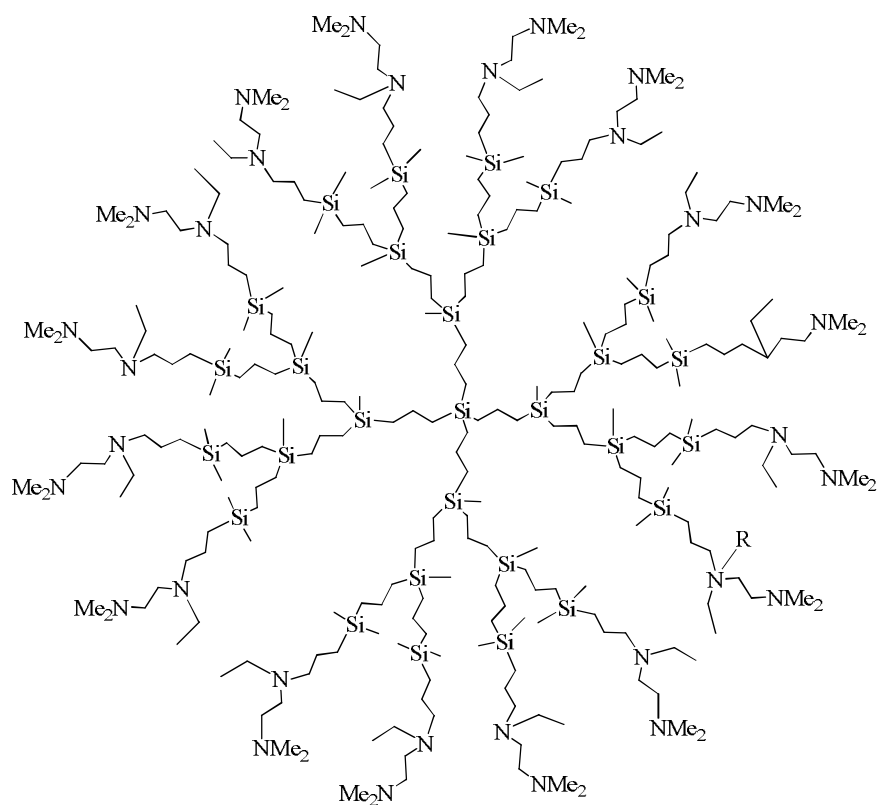

**Figure S1.** Molecular representation of amine-terminated carbosilane dendrimers 3-5.

A)  $[(\text{CH}_2=\text{CHCH}_2)\text{N}(\text{Et})(\text{CH}_2\text{CH}_2\text{NMe}_2)]$  (1)

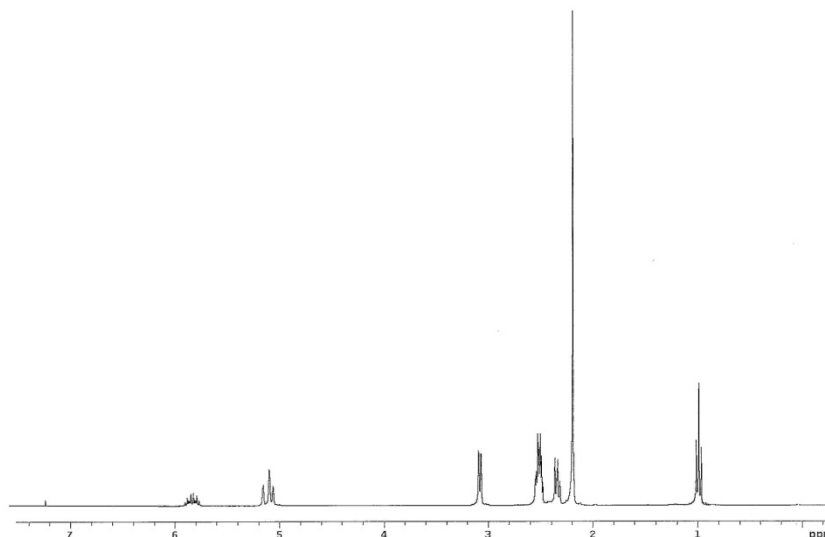

**Figure S2.**  $^1\text{H}$  NMR spectrum of  $[(\text{CH}_2=\text{CHCH}_2)\text{N}(\text{Et})(\text{CH}_2\text{CH}_2\text{NMe}_2)]$  (1) in  $\text{CDCl}_3$ .

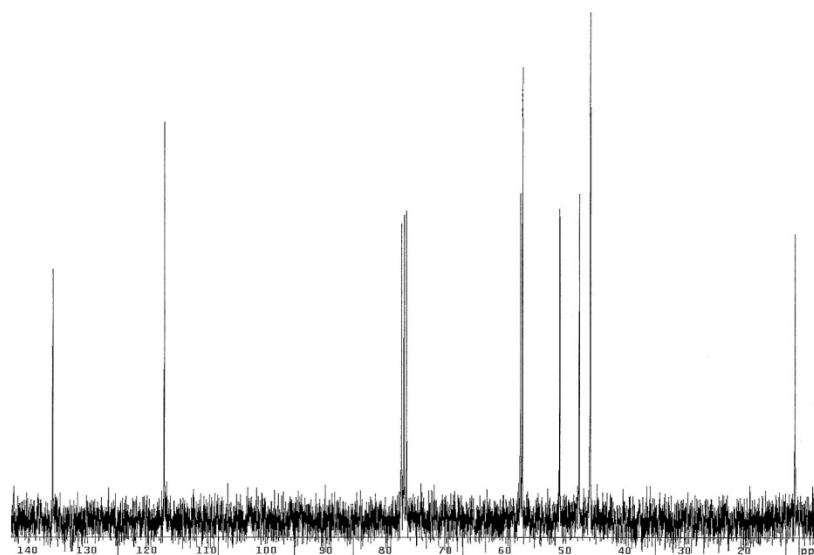

**Figure S3.**  $^{13}\text{C}$  NMR spectrum of  $[(\text{CH}_2=\text{CHCH}_2)\text{N}(\text{Et})(\text{CH}_2\text{CH}_2\text{NMe}_2)]$  (1) in  $\text{CDCl}_3$ .

**Adduct [(CH<sub>2</sub>=CHCH<sub>2</sub>)N(Et)(CH<sub>2</sub>CH<sub>2</sub>NMe<sub>2</sub>)] (1)·LiBr**

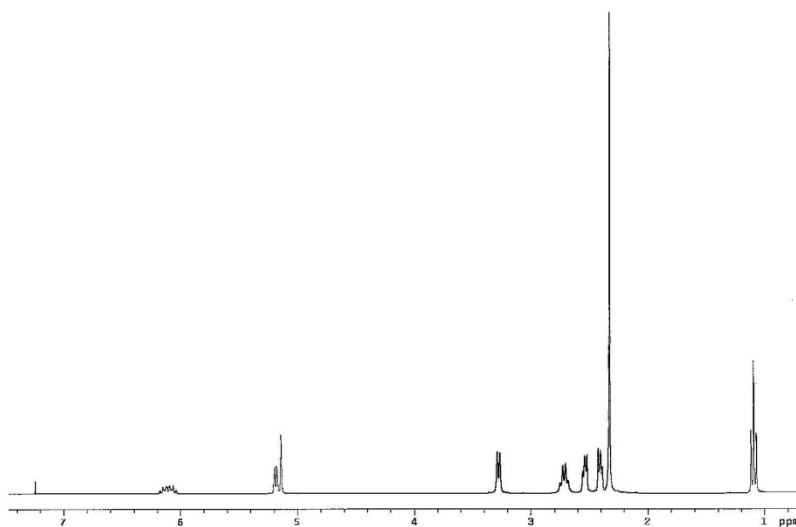

**Figure S4.** <sup>1</sup>H NMR spectrum of adduct [(CH<sub>2</sub>=CHCH<sub>2</sub>)N(Et)(CH<sub>2</sub>CH<sub>2</sub>NMe<sub>2</sub>)] (1)·LiBr in CDCl<sub>3</sub>.

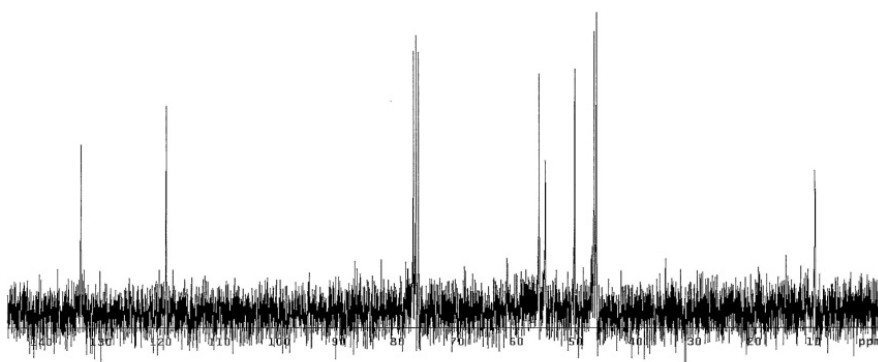

**Figure S5.** <sup>13</sup>C NMR spectrum of adduct [(CH<sub>2</sub>=CHCH<sub>2</sub>)N(Et)(CH<sub>2</sub>CH<sub>2</sub>NMe<sub>2</sub>)] (1)·LiBr in CDCl<sub>3</sub>.

B)  $[(Et_3SiCH_2CH_2CH_2)N(Et)(CH_2CH_2NMe_2)]$  (2)

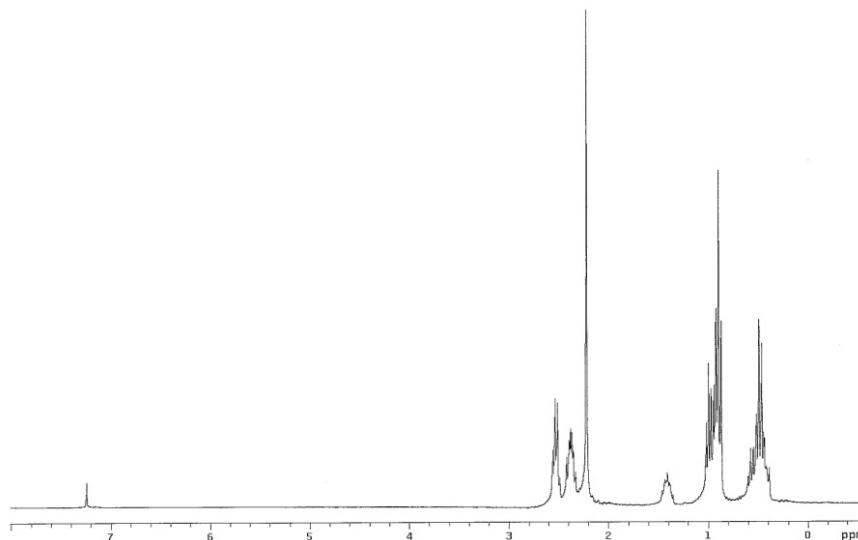

**Figure S6.**  $^1H$  NMR spectrum of  $[(Et_3SiCH_2CH_2CH_2)N(Et)(CH_2CH_2NMe_2)]$  (2) in  $CDCl_3$ .

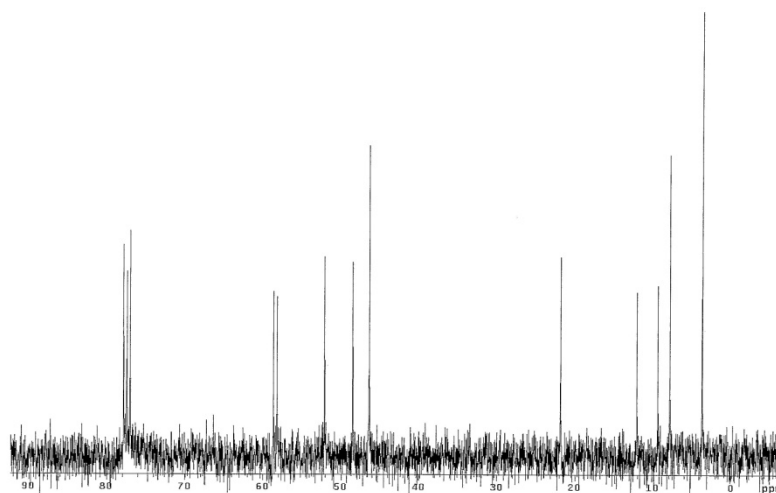

**Figure S7.**  $^{13}C$  NMR spectrum of  $[(Et_3SiCH_2CH_2CH_2)N(Et)(CH_2CH_2NMe_2)]$  (2) in  $CDCl_3$ .

C)  $G_1$ -[Si(CH<sub>2</sub>CH<sub>2</sub>CH<sub>2</sub>)N(Et)(CH<sub>2</sub>CH<sub>2</sub>NMe<sub>2</sub>)]<sub>4</sub> (**3**)

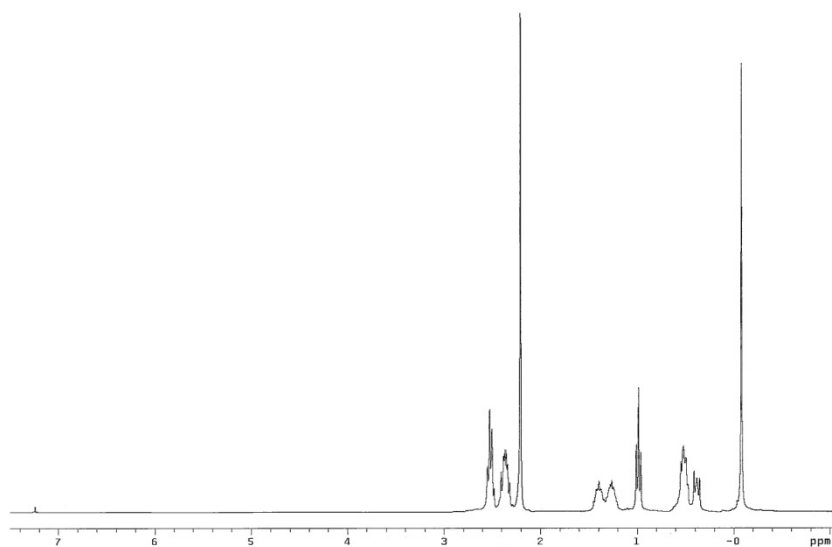

**Figure S8.** <sup>1</sup>H NMR spectrum of  $G_1$ -[Si(CH<sub>2</sub>CH<sub>2</sub>CH<sub>2</sub>)N(Et)(CH<sub>2</sub>CH<sub>2</sub>NMe<sub>2</sub>)]<sub>4</sub> (**3**) in CDCl<sub>3</sub>.

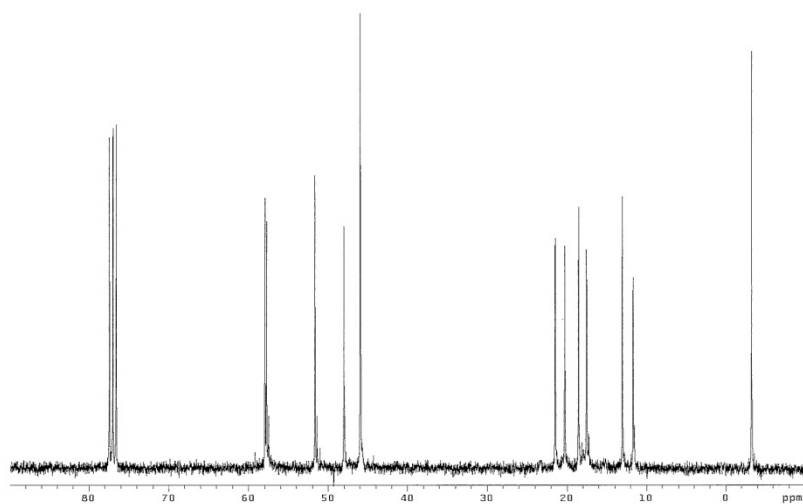

**Figure S9.** <sup>13</sup>C NMR spectrum of  $G_1$ -[Si(CH<sub>2</sub>CH<sub>2</sub>CH<sub>2</sub>)N(Et)(CH<sub>2</sub>CH<sub>2</sub>NMe<sub>2</sub>)]<sub>4</sub> (**3**) in CDCl<sub>3</sub>.

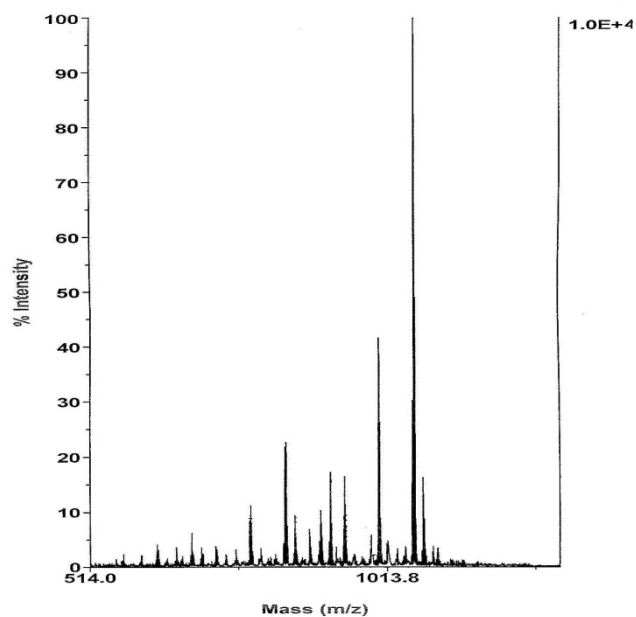

**Figure S10.** MALDI-TOF spectrum of  $G_1$ -[Si(CH<sub>2</sub>CH<sub>2</sub>CH<sub>2</sub>)N(Et)(CH<sub>2</sub>CH<sub>2</sub>NMe<sub>2</sub>)<sub>4</sub> (**3**) in dithranol.

**D)  $G_2$ -[Si(CH<sub>2</sub>CH<sub>2</sub>CH<sub>2</sub>)N(Et)(CH<sub>2</sub>CH<sub>2</sub>NMe<sub>2</sub>)<sub>8</sub> (**4**)**

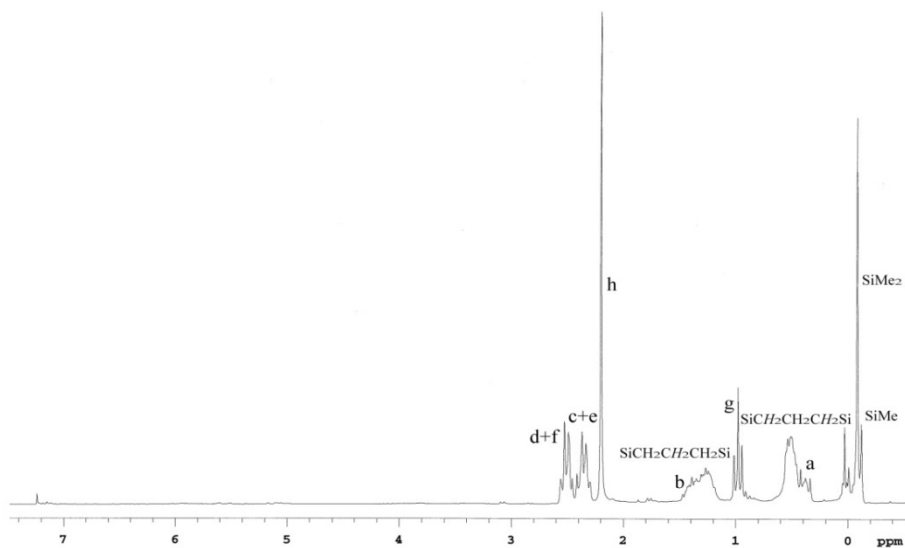

**Figure S11.** <sup>1</sup>H NMR spectrum of  $G_2$ -[Si(CH<sub>2</sub>CH<sub>2</sub>CH<sub>2</sub>)N(Et)(CH<sub>2</sub>CH<sub>2</sub>NMe<sub>2</sub>)<sub>8</sub> (**4**) in CDCl<sub>3</sub>.

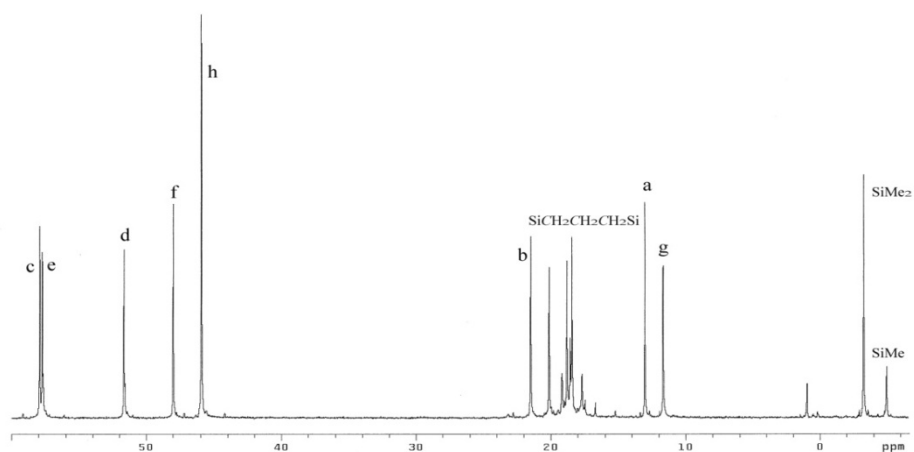

**Figure S12.**  $^{13}\text{C}$  NMR spectrum of  $\text{G}_2\text{-}[\text{Si}(\text{CH}_2\text{CH}_2\text{CH}_2)\text{N}(\text{Et})(\text{CH}_2\text{CH}_2\text{NMe}_2)]_8$  (**4**) in  $\text{CDCl}_3$ .

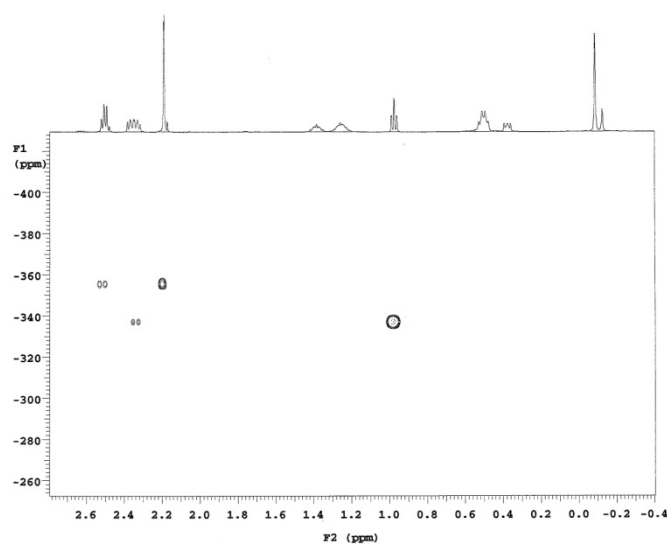

**Figure S13.** HMBC  $\{^1\text{H}\text{-}^{15}\text{N}\}$  spectrum of  $\text{G}_2\text{-}[\text{Si}(\text{CH}_2\text{CH}_2\text{CH}_2)\text{N}(\text{Et})(\text{CH}_2\text{CH}_2\text{NMe}_2)]_8$  (**4**) in  $\text{CDCl}_3$ .



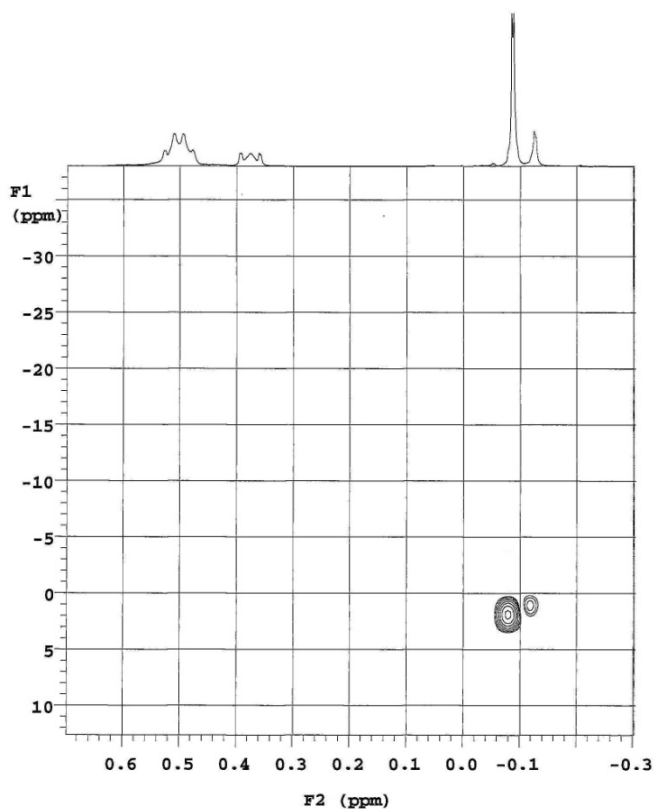

**Figure S14.** HMBC  $\{^1\text{H}-^{29}\text{Si}\}$  spectrum of  $\text{G}_2\text{-}[\text{Si}(\text{CH}_2\text{CH}_2\text{CH}_2)\text{N}(\text{Et})(\text{CH}_2\text{CH}_2\text{NMe}_2)]_8$  (**4**) in  $\text{CDCl}_3$ .

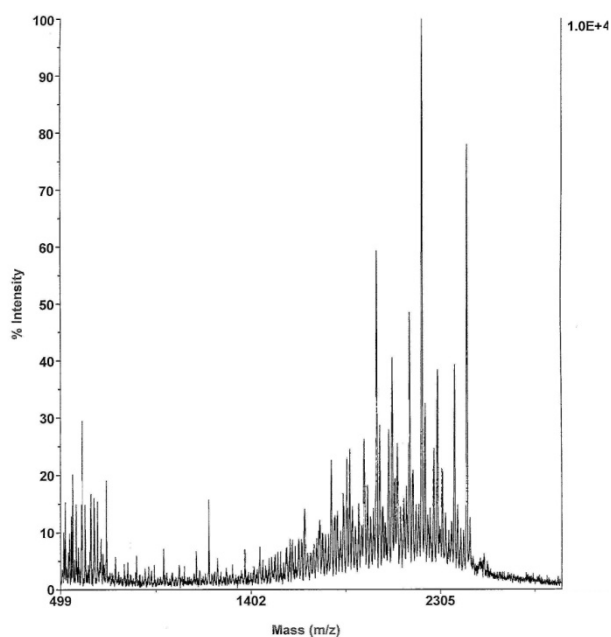

**Figure S15.** MALDI-TOF spectrum of  $\text{G}_2\text{-}[\text{Si}(\text{CH}_2\text{CH}_2\text{CH}_2)\text{N}(\text{Et})(\text{CH}_2\text{CH}_2\text{NMe}_2)]_8$  (**4**) in dithranol.

E) **G<sub>3</sub>-[Si(CH<sub>2</sub>CH<sub>2</sub>CH<sub>2</sub>)N(Et)(CH<sub>2</sub>CH<sub>2</sub>NMe<sub>2</sub>)]<sub>16</sub> (5)**

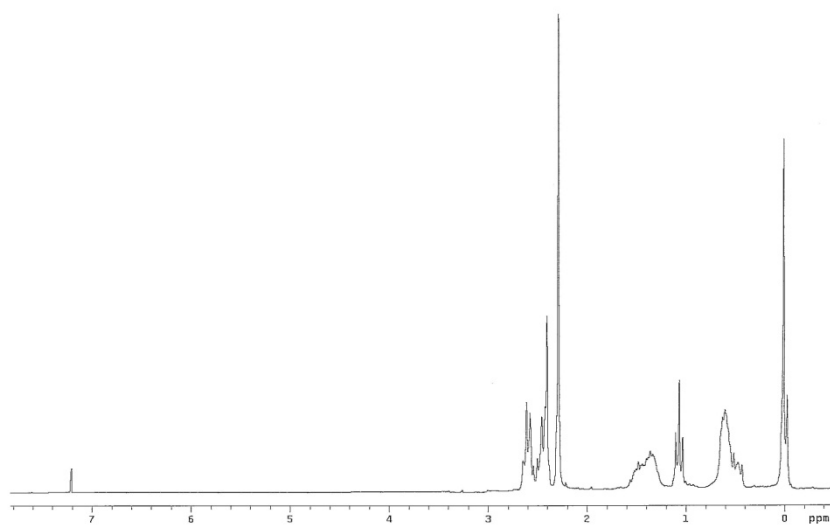

**Figure S16.** <sup>1</sup>H NMR spectrum of G<sub>3</sub>-[Si(CH<sub>2</sub>CH<sub>2</sub>CH<sub>2</sub>)N(Et)(CH<sub>2</sub>CH<sub>2</sub>NMe<sub>2</sub>)]<sub>16</sub> (5) in CDCl<sub>3</sub>.

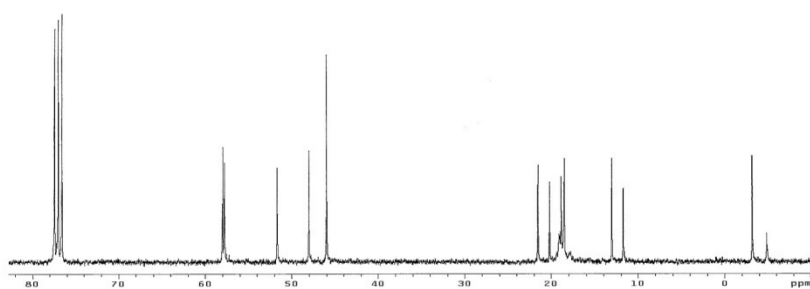

**Figure S17.** <sup>13</sup>C NMR spectrum of G<sub>3</sub>-[Si(CH<sub>2</sub>CH<sub>2</sub>CH<sub>2</sub>)N(Et)(CH<sub>2</sub>CH<sub>2</sub>NMe<sub>2</sub>)]<sub>16</sub> (5) in CDCl<sub>3</sub>.

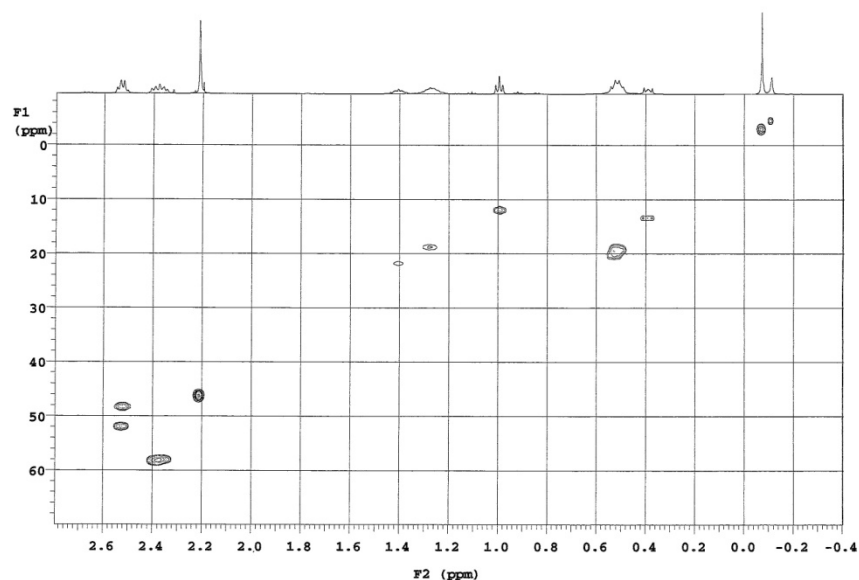

**Figure S18.** HMQC- $\{^1\text{H}-^{13}\text{C}\}$  spectrum of  $\text{G}_3\text{-}[\text{Si}(\text{CH}_2\text{CH}_2\text{CH}_2)\text{N}(\text{Et})(\text{CH}_2\text{CH}_2\text{NMe}_2)]_{16}$  (**5**) in  $\text{CDCl}_3$ .

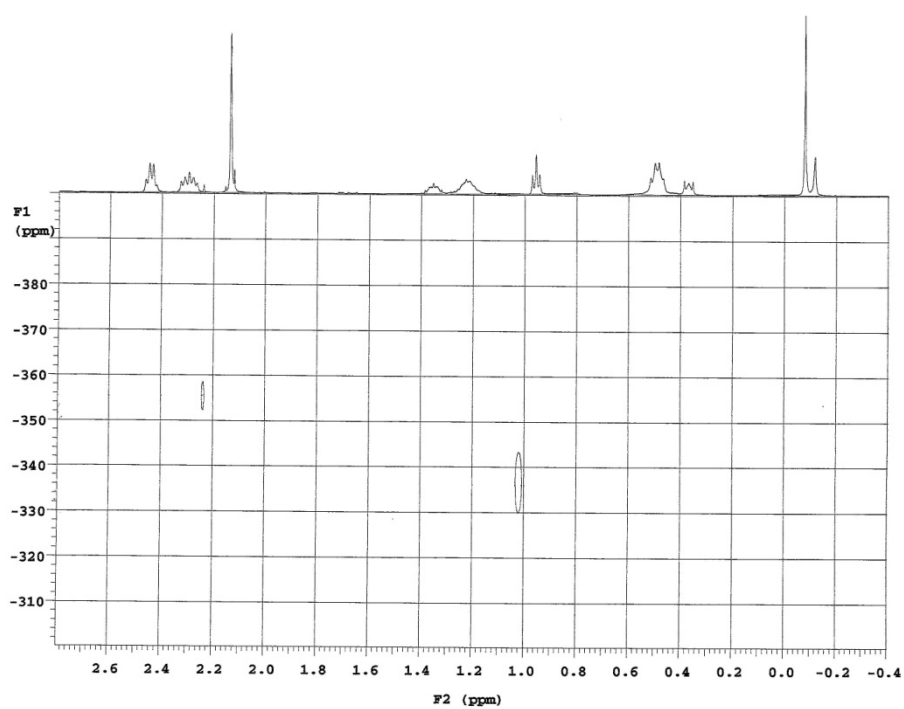

**Figure S19.** HMBC  $\{^1\text{H}-^{15}\text{N}\}$  spectrum of  $\text{G}_3\text{-}[\text{Si}(\text{CH}_2\text{CH}_2\text{CH}_2)\text{N}(\text{Et})(\text{CH}_2\text{CH}_2\text{NMe}_2)]_{16}$  (**5**) in  $\text{CDCl}_3$ .

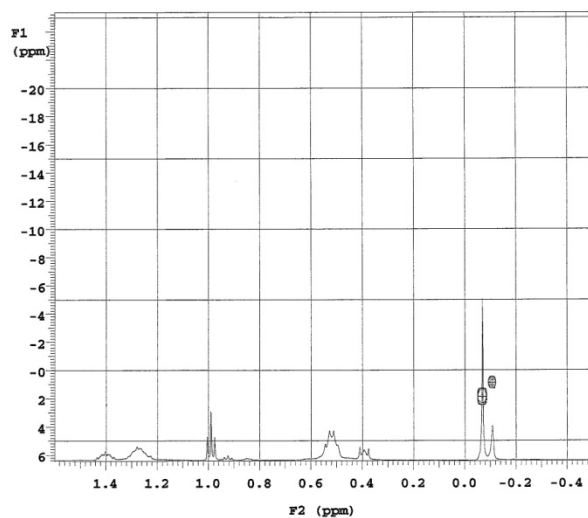

**Figure S20.** HMBC  $\{^1\text{H}-^{29}\text{Si}\}$  spectrum of  $\text{G}_3\text{-}[\text{Si}(\text{CH}_2\text{CH}_2\text{CH}_2)\text{N}(\text{Et})(\text{CH}_2\text{CH}_2\text{NMe}_2)]_{16}$  (**5**) in  $\text{CDCl}_3$ .

**F)  $\{[\text{Et}_3\text{Si}(\text{CH}_2\text{CH}_2\text{CH}_2)\text{N}^+\text{H}(\text{Et})(\text{CH}_2\text{CH}_2\text{N}^+\text{HMe}_2)]_2\text{Cl}\}$  (**6**)**

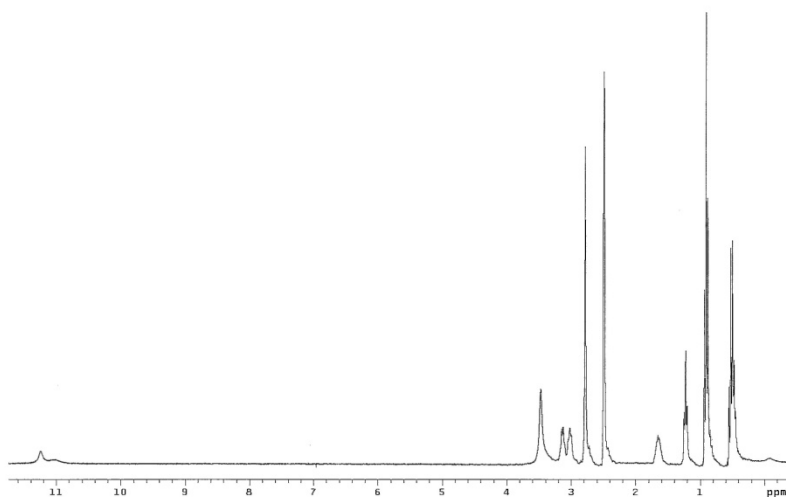

**Figure S21.**  $^1\text{H}$  NMR spectrum of  $\{[\text{Et}_3\text{Si}(\text{CH}_2\text{CH}_2\text{CH}_2)\text{N}^+\text{H}(\text{Et})(\text{CH}_2\text{CH}_2\text{N}^+\text{HMe}_2)]_2\text{Cl}\}$  (**6**) in  $\text{DMSO}$ .

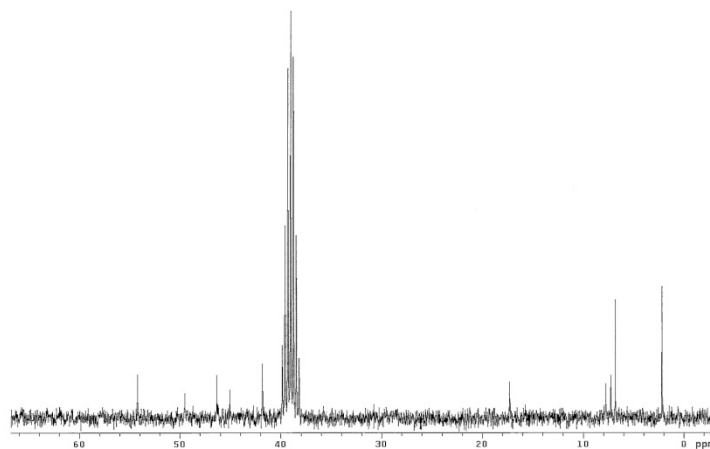

**Figure S22.**  $^{13}\text{C}$  NMR spectrum of  $\{[\text{Et}_3\text{Si}(\text{CH}_2\text{CH}_2\text{CH}_2)\text{N}^+\text{H}(\text{Et})(\text{CH}_2\text{CH}_2\text{N}^+\text{HMe}_2)]_2\text{Cl}^-\}$  (**6**) in DMSO.

**G)  $\text{G}_1\text{-}\{[\text{Si}(\text{CH}_2\text{CH}_2\text{CH}_2)\text{N}^+\text{H}(\text{Et})(\text{CH}_2\text{CH}_2\text{N}^+\text{HMe}_2)]_4\text{8Cl}^-\}$  (**7**)**

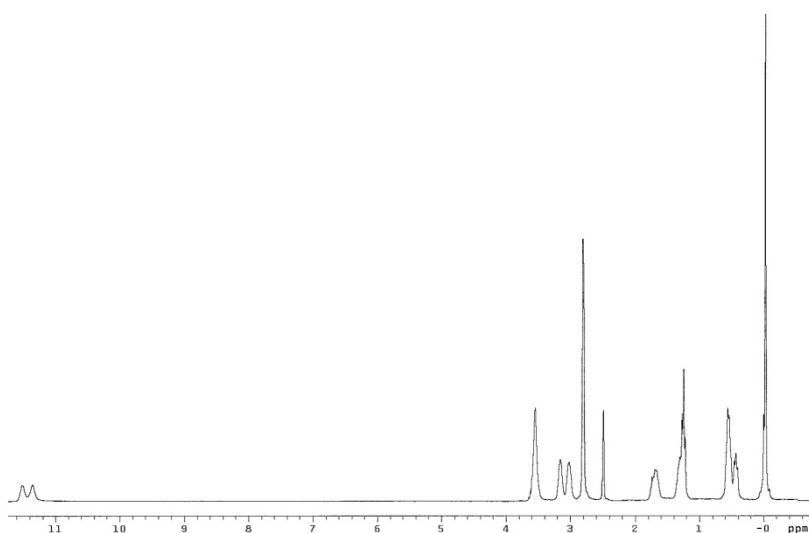

**Figure S23.**  $^1\text{H}$  NMR spectrum of  $\text{G}_1\text{-}\{[\text{Si}(\text{CH}_2\text{CH}_2\text{CH}_2)\text{N}^+\text{H}(\text{Et})(\text{CH}_2\text{CH}_2\text{N}^+\text{HMe}_2)]_4\text{8Cl}^-\}$  (**7**) in DMSO.

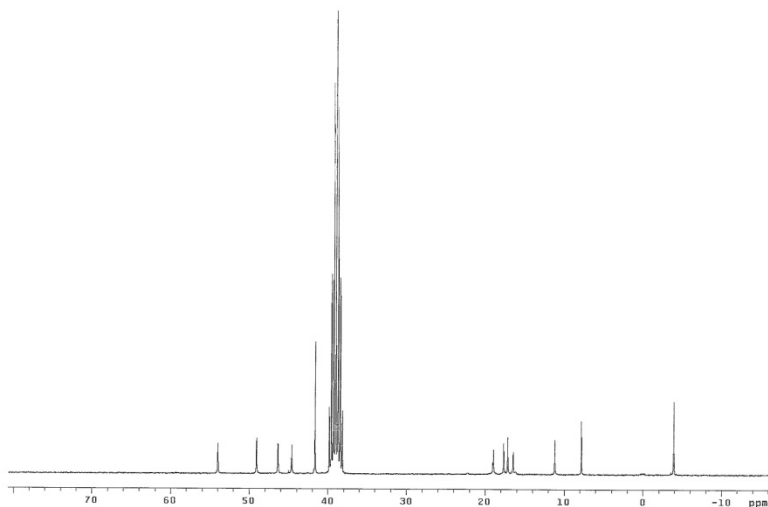

**Figure S24.**  $^{13}\text{C}$  NMR spectrum of  $\text{G}_1\text{-}\{[\text{Si}(\text{CH}_2\text{CH}_2\text{CH}_2\text{N}^+\text{H}(\text{Et})(\text{CH}_2\text{CH}_2\text{N}^+\text{HMe}_2)]_4\text{8Cl}^-\}$  (**7**) in DMSO.

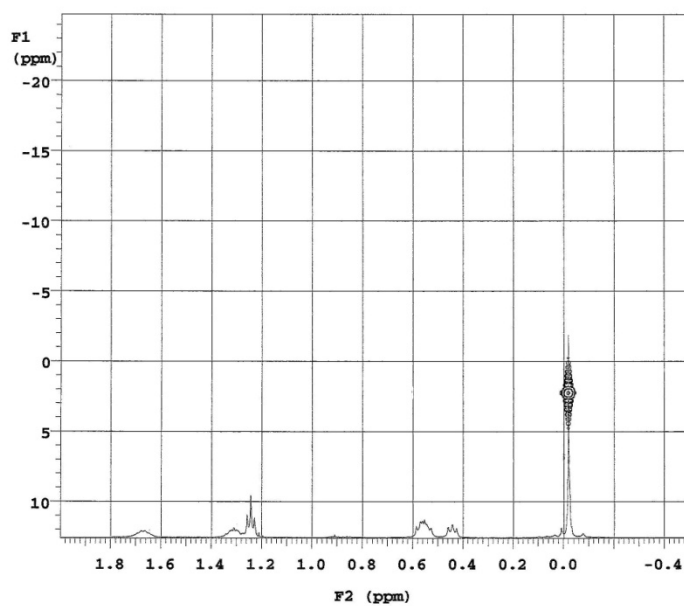

**Figure S25.** HMBC  $\{^1\text{H}\text{-}^{29}\text{Si}\}$  spectrum of  $\text{G}_1\text{-}\{[\text{Si}(\text{CH}_2\text{CH}_2\text{CH}_2\text{N}^+\text{H}(\text{Et})(\text{CH}_2\text{CH}_2\text{N}^+\text{HMe}_2)]_4\text{8Cl}^-\}$  (**7**) in DMSO.

H)  $G_2\text{-}\{[\text{Si}(\text{CH}_2\text{CH}_2\text{CH}_2)\text{N}^+\text{H}(\text{Et})(\text{CH}_2\text{CH}_2\text{N}^+\text{HMe}_2)]_8\text{16Cl}\}$  (**8**)

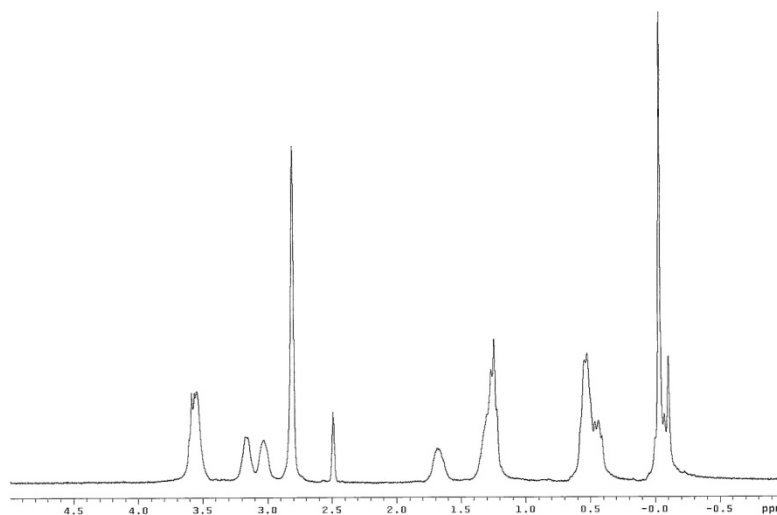

**Figure S26.**  $^1\text{H}$  NMR spectrum of  $G_2\text{-}\{[\text{Si}(\text{CH}_2\text{CH}_2\text{CH}_2)\text{N}^+\text{H}(\text{Et})(\text{CH}_2\text{CH}_2\text{N}^+\text{HMe}_2)]_8\text{16Cl}\}$  (**8**) in DMSO.

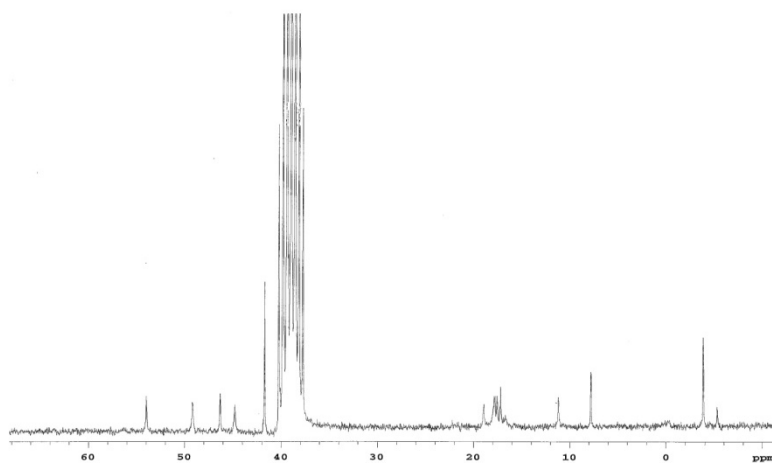

**Figure S27.**  $^{13}\text{C}$  NMR spectrum of  $G_2\text{-}\{[\text{Si}(\text{CH}_2\text{CH}_2\text{CH}_2)\text{N}^+\text{H}(\text{Et})(\text{CH}_2\text{CH}_2\text{N}^+\text{HMe}_2)]_8\text{16Cl}\}$  (**8**) in DMSO.

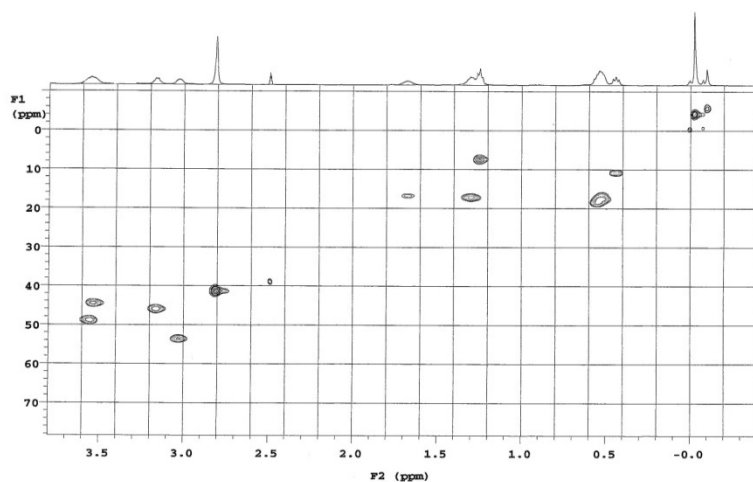

**Figure S28.** HMQC- $\{^1\text{H}-^{13}\text{C}\}$  spectrum of  $\text{G}_2\text{-}\{[\text{Si}(\text{CH}_2\text{CH}_2\text{CH}_2)\text{N}^+\text{H}(\text{Et})(\text{CH}_2\text{CH}_2\text{N}^+\text{HMe}_2)]_8\text{16Cl}\}$  (**8**) in DMSO.

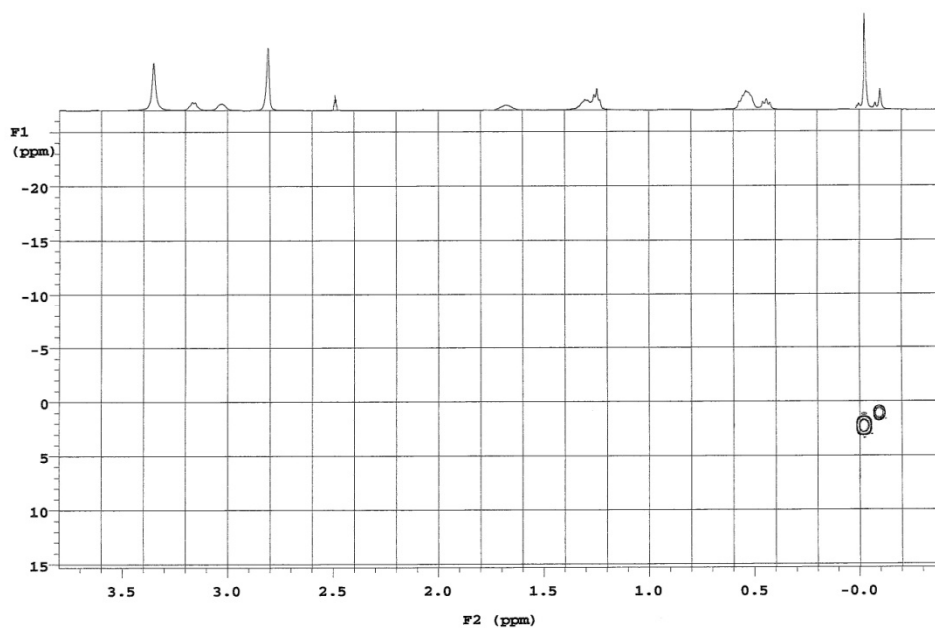

**Figure S29.** HMBC  $\{^1\text{H}-^{29}\text{Si}\}$  spectrum of  $\text{G}_2\text{-}\{[\text{Si}(\text{CH}_2\text{CH}_2\text{CH}_2)\text{N}^+\text{H}(\text{Et})(\text{CH}_2\text{CH}_2\text{N}^+\text{HMe}_2)]_8\text{16Cl}\}$  (**8**) in DMSO.



I)  $G_3\text{-}\{[\text{Si}(\text{CH}_2\text{CH}_2\text{CH}_2)\text{N}^+\text{H}(\text{Et})(\text{CH}_2\text{CH}_2\text{N}^+\text{HMe}_2)]_{16}\text{32Cl}\}$  (9)

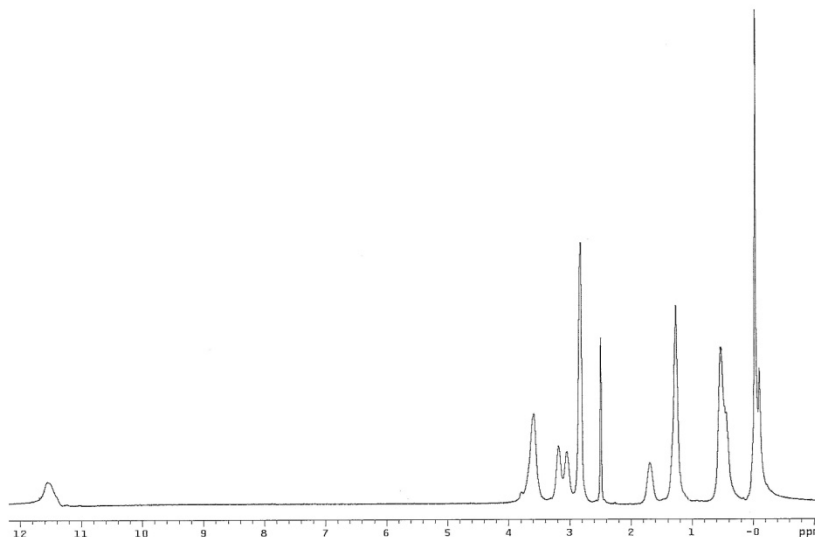

**Figure S30.**  $^1\text{H}$  spectrum of  $G_3\text{-}\{[\text{Si}(\text{CH}_2\text{CH}_2\text{CH}_2)\text{N}^+\text{H}(\text{Et})(\text{CH}_2\text{CH}_2\text{N}^+\text{HMe}_2)]_{16}\text{32Cl}\}$  (9) in DMSO.

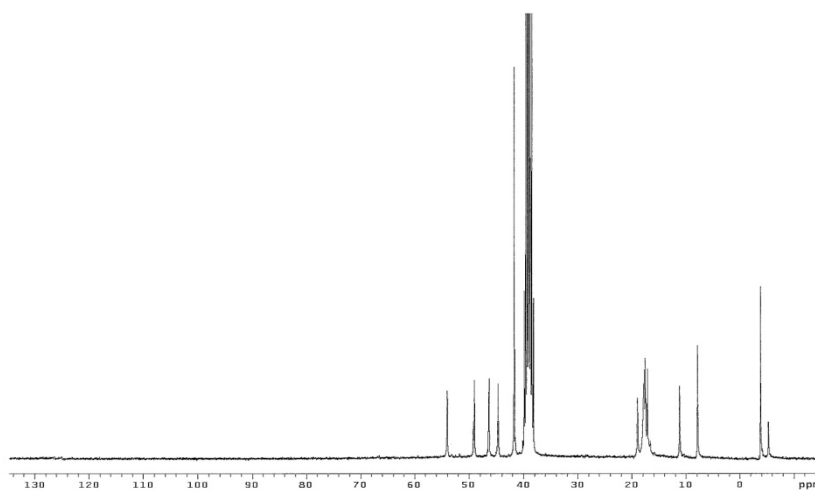

**Figure S31.**  $^{13}\text{C}$  spectrum of  $G_3\text{-}\{[\text{Si}(\text{CH}_2\text{CH}_2\text{CH}_2)\text{N}^+\text{H}(\text{Et})(\text{CH}_2\text{CH}_2\text{N}^+\text{HMe}_2)]_{16}\text{32Cl}\}$  (9) in DMSO.

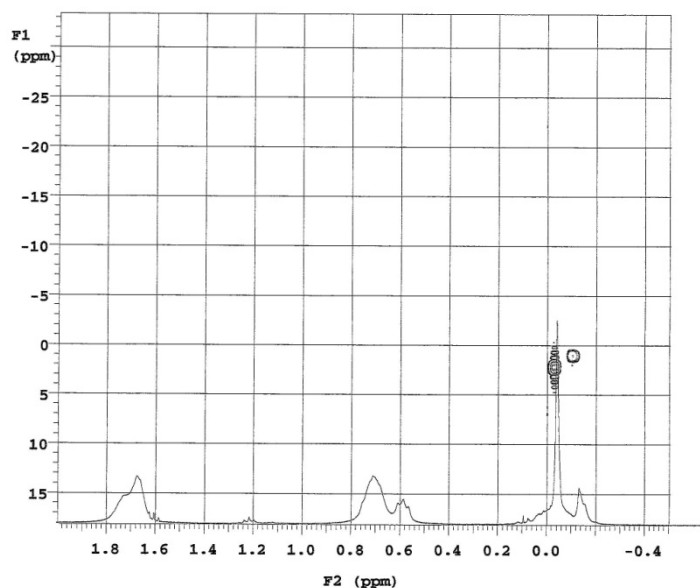

**Figure S32.** HMBC  $\{^1\text{H}-^{29}\text{Si}\}$  spectrum of  $\text{G}_3\text{-}\{[\text{Si}(\text{CH}_2\text{CH}_2\text{CH}_2)\text{N}^+\text{H}(\text{Et})(\text{CH}_2\text{CH}_2\text{N}^+\text{HMe}_2)]_{16} \text{32Cl}^-\}$  (**9**) in DMSO.

J)  $\{[\text{Et}_3\text{Si}(\text{CH}_2\text{CH}_2\text{CH}_2)\text{N}^+\text{Me}(\text{Et})(\text{CH}_2\text{CH}_2\text{N}^+\text{Me}_3)] \text{2I}^-\}$  (**10**)

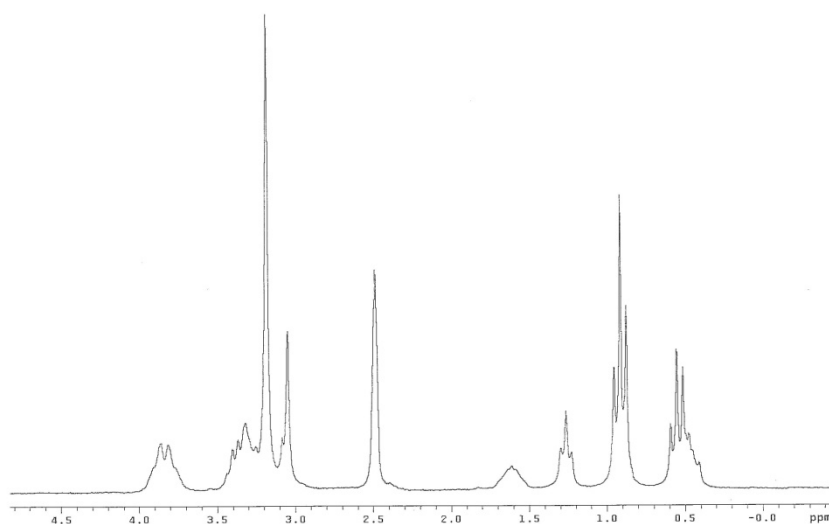

**Figure S33.**  $^1\text{H}$  spectrum of  $\{[\text{Et}_3\text{Si}(\text{CH}_2\text{CH}_2\text{CH}_2)\text{N}^+\text{Me}(\text{Et})(\text{CH}_2\text{CH}_2\text{N}^+\text{Me}_3)] \text{2I}^-\}$  (**10**) in DMSO.

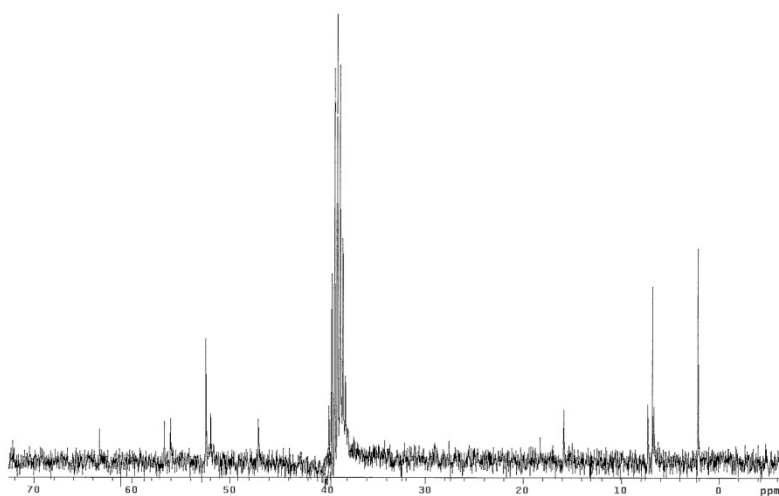

**Figure S34.**  $^{13}\text{C}$  spectrum of  $\{[\text{Et}_3\text{Si}(\text{CH}_2\text{CH}_2\text{CH}_2)\text{N}^+\text{Me}(\text{Et})(\text{CH}_2\text{CH}_2\text{N}^+\text{Me}_3)] 2\text{I}^-\}$  (**10**) in DMSO.

K)  $\text{G}_1\text{-}\{\text{Si}(\text{CH}_2\text{CH}_2\text{CH}_2)\text{N}^+(\text{Me})(\text{Et})(\text{CH}_2\text{CH}_2\text{NMe}_3^+)\}_4 8\text{I}^-\}$  (**11**)

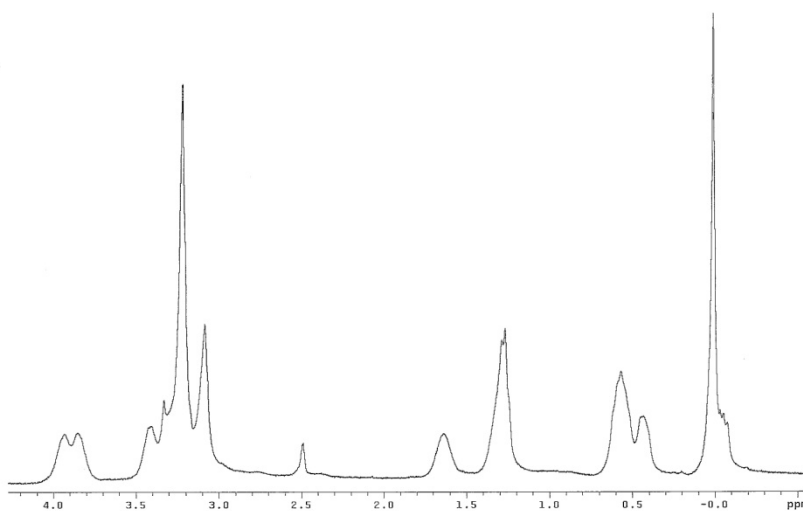

**Figure S35.**  $^1\text{H}$  spectrum of  $\text{G}_1\text{-}\{\text{Si}(\text{CH}_2\text{CH}_2\text{CH}_2)\text{N}^+(\text{Me})(\text{Et})(\text{CH}_2\text{CH}_2\text{NMe}_3^+)\}_4 8\text{I}^-\}$  (**11**) in DMSO.

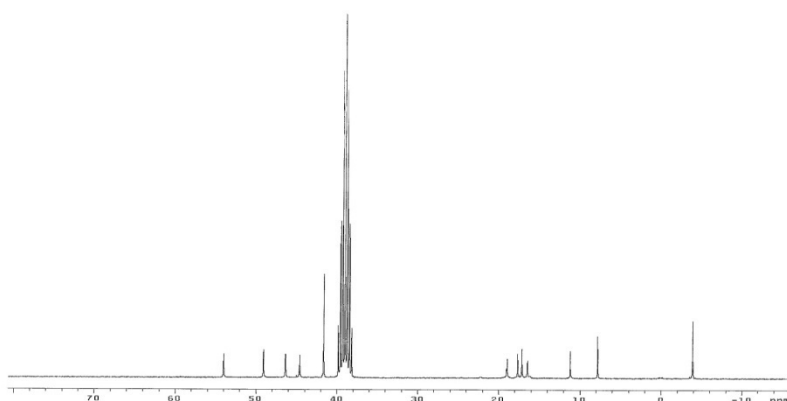

**Figure S36.**  $^{13}\text{C}$  spectrum of  $\text{G}_1\text{-}\{[\text{Si}(\text{CH}_2\text{CH}_2\text{CH}_2)\text{N}^+(\text{Me})(\text{Et})(\text{CH}_2\text{CH}_2\text{NMe}^+_3)]_4\text{8I}^-\}$  (**11**) in DMSO.

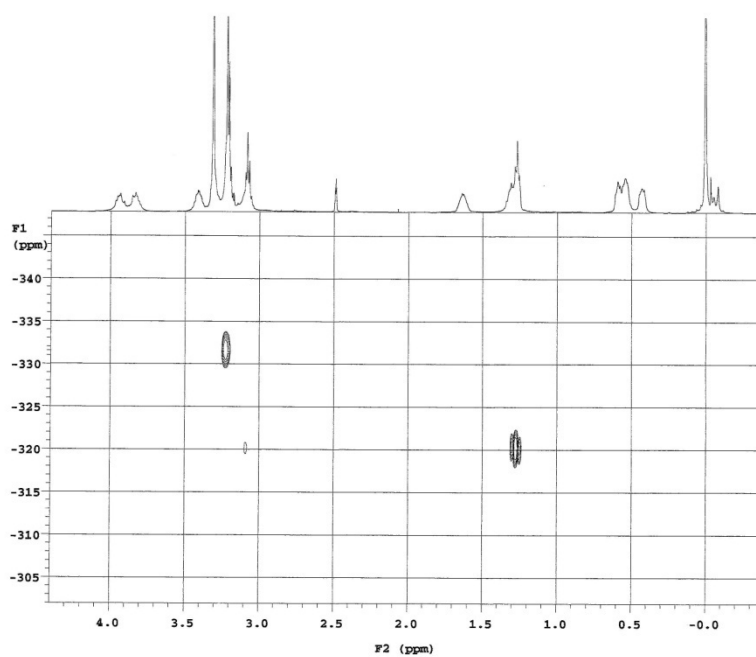

**Figure S37.** HMBC  $\{^1\text{H}\text{-}^{15}\text{N}\}$  of  $\text{G}_1\text{-}\{[\text{Si}(\text{CH}_2\text{CH}_2\text{CH}_2)\text{N}^+(\text{Me})(\text{Et})(\text{CH}_2\text{CH}_2\text{NMe}^+_3)]_4\text{8I}^-\}$  (**11**) in DMSO.

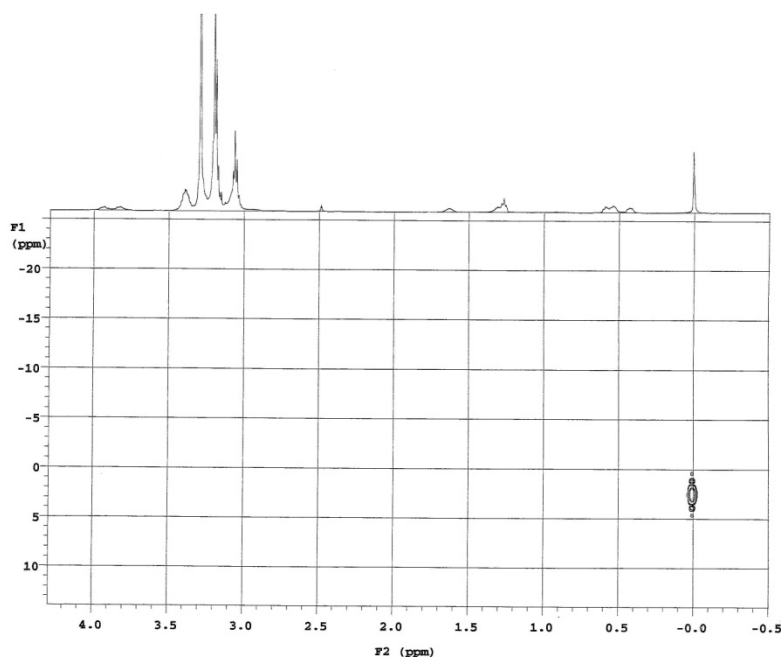

**Figure S38.** HMBC  $\{^1\text{H}-^{29}\text{Si}\}$  spectrum of  $\text{G}_1\text{-}\{\text{Si}(\text{CH}_2\text{CH}_2\text{CH}_2)\text{N}^+(\text{Me})(\text{Et})(\text{CH}_2\text{CH}_2\text{NMe}^+_3)_4\text{ 8I}^-\}$  (**11**) in DMSO.

L)  $\text{G}_2\text{-}\{\text{Si}(\text{CH}_2\text{CH}_2\text{CH}_2)\text{N}^+(\text{Me})(\text{Et})(\text{CH}_2\text{CH}_2\text{NMe}^+_3)_8\text{ 16I}^-\}$  (**12**)

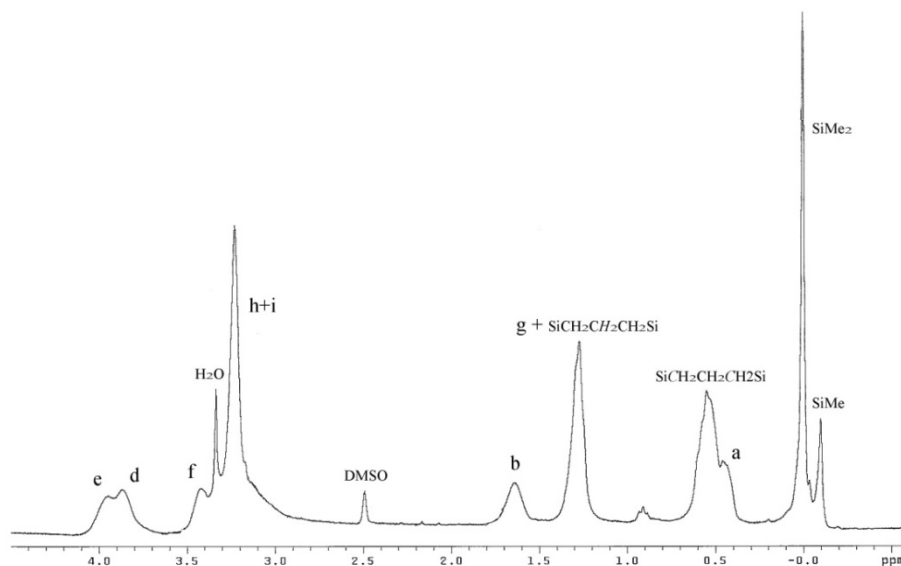

**Figure S39.**  $^1\text{H}$  NMR spectrum of  $\text{G}_2\text{-}\{\text{Si}(\text{CH}_2\text{CH}_2\text{CH}_2)\text{N}^+(\text{Me})(\text{Et})(\text{CH}_2\text{CH}_2\text{NMe}^+_3)_4\text{ 16I}^-\}$  (**12**) in DMSO.

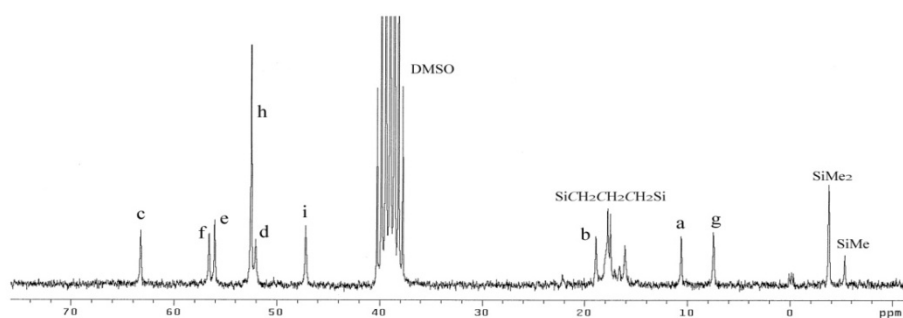

**Figure S40.**  $^{13}\text{C}$  NMR spectrum of  $\text{G}_2\text{-}\{[\text{Si}(\text{CH}_2\text{CH}_2\text{CH}_2)\text{N}^+(\text{Me})(\text{Et})(\text{CH}_2\text{CH}_2\text{NMe}_3)_4\text{16I}^-\}$  (**12**) in DMSO.

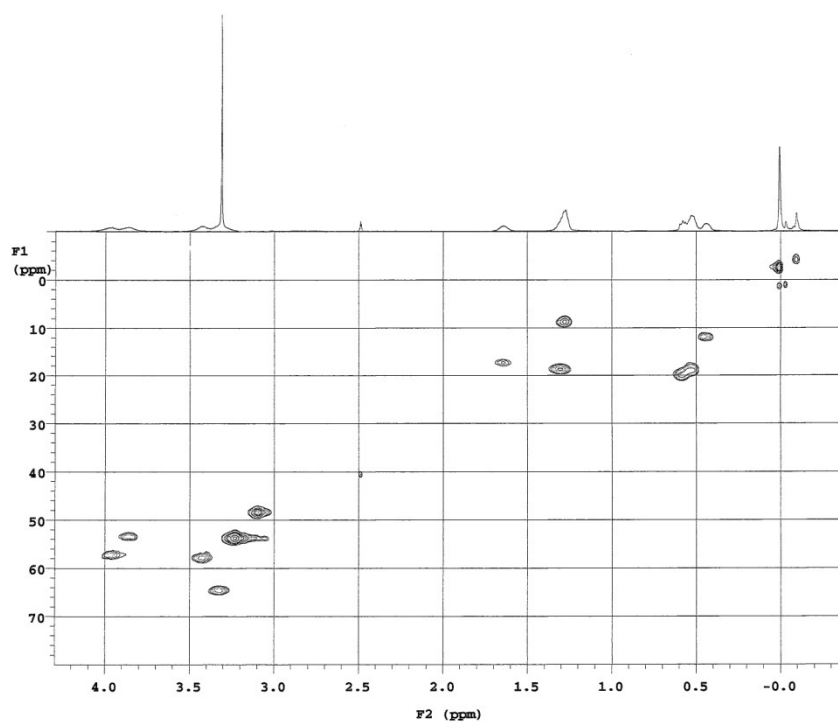

**Figure S41.** HMQC- $\{^1\text{H}\text{-}^{13}\text{C}\}$  spectrum of  $\text{G}_2\text{-}\{[\text{Si}(\text{CH}_2\text{CH}_2\text{CH}_2)\text{N}^+(\text{Me})(\text{Et})(\text{CH}_2\text{CH}_2\text{NMe}_3)_4\text{16I}^-\}$  (**12**) in DMSO.

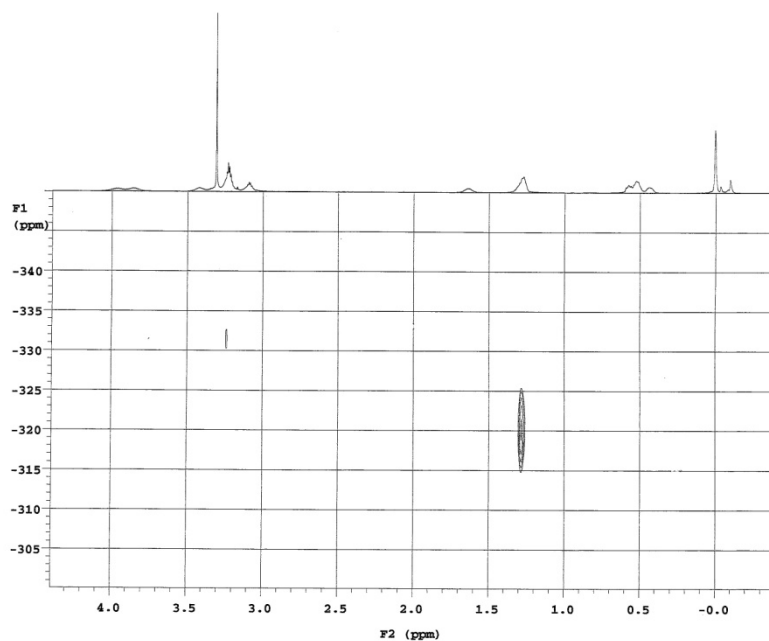

**Figure S42.** HMBC  $\{^1\text{H}-^{15}\text{N}\}$  spectrum of  $\text{G}_2\text{-}\{[\text{Si}(\text{CH}_2\text{CH}_2\text{CH}_2)\text{N}^+(\text{Me})(\text{Et})(\text{CH}_2\text{CH}_2\text{NMe}_3)]_4\text{16I}^-\}$  (**12**) in DMSO.

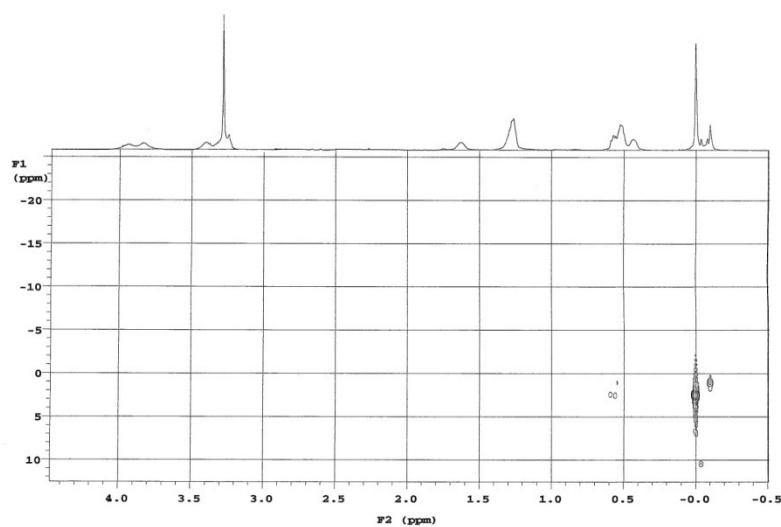

**Figure S43.** HMBC  $\{^1\text{H}-^{29}\text{Si}\}$  spectrum of  $\text{G}_2\text{-}\{[\text{Si}(\text{CH}_2\text{CH}_2\text{CH}_2)\text{N}^+(\text{Me})(\text{Et})(\text{CH}_2\text{CH}_2\text{NMe}_3)]_4\text{16I}^-\}$  (**12**) in DMSO.

M)  $G_3\text{-}\{\text{Si}(\text{CH}_2\text{CH}_2\text{CH}_2)\text{N}^+(\text{Me})(\text{Et})(\text{CH}_2\text{CH}_2\text{NMe}_3)\}_{16} 32\Gamma\}$  (13)

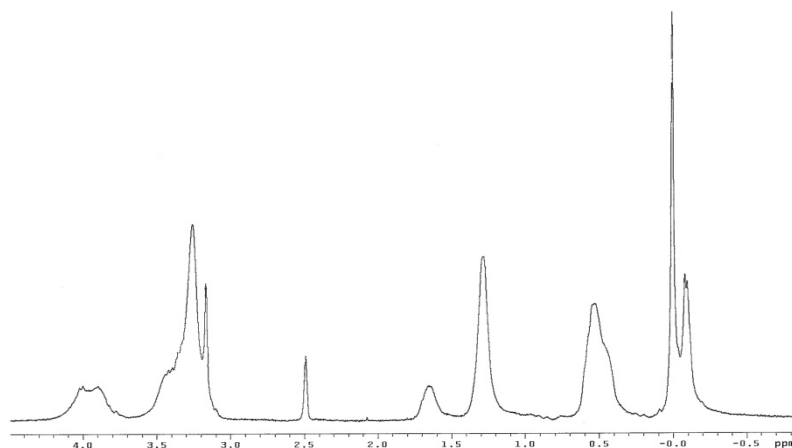

**Figure S44.**  $^1\text{H}$  NMR spectrum of  $G_3\text{-}\{\text{Si}(\text{CH}_2\text{CH}_2\text{CH}_2)\text{N}^+(\text{Me})(\text{Et})(\text{CH}_2\text{CH}_2\text{NMe}_3)\}_{16} 32\Gamma\}$  (13) in DMSO.

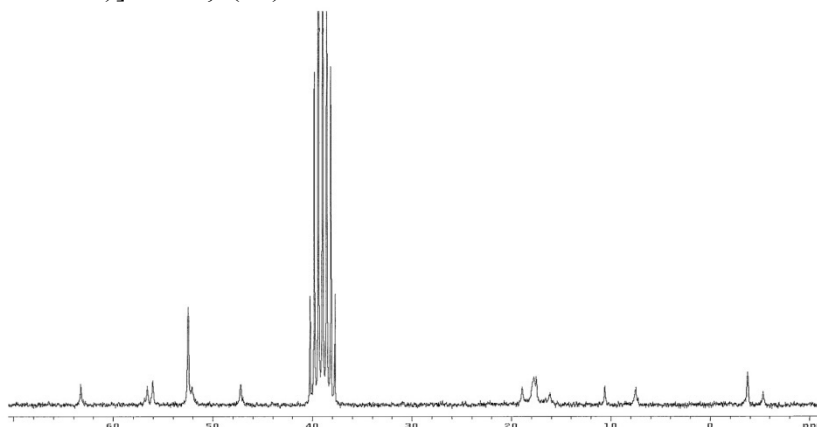

**Figure S45.**  $^{13}\text{C}$  spectrum of  $G_3\text{-}\{\text{Si}(\text{CH}_2\text{CH}_2\text{CH}_2)\text{N}^+(\text{Me})(\text{Et})(\text{CH}_2\text{CH}_2\text{NMe}_3)\}_{16} 32\Gamma\}$  (13) in DMSO.



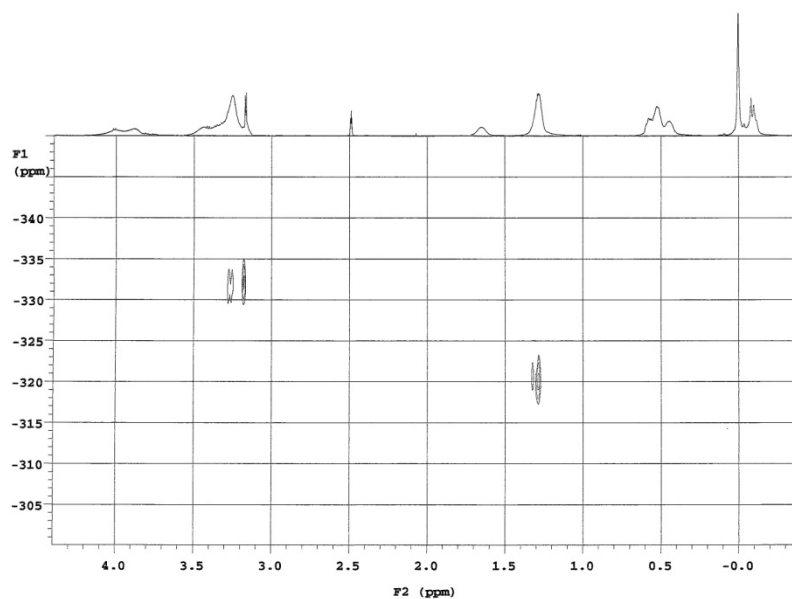

**Figure S46.** HMBC  $\{^1\text{H}-^{15}\text{N}\}$  spectrum of  $\text{G}_3\text{-}\{[\text{Si}(\text{CH}_2\text{CH}_2\text{CH}_2)\text{N}^+(\text{Me})(\text{Et})(\text{CH}_2\text{CH}_2\text{NMe}_3)]_{16}\text{32}\Gamma\}$  (**13**) in DMSO.

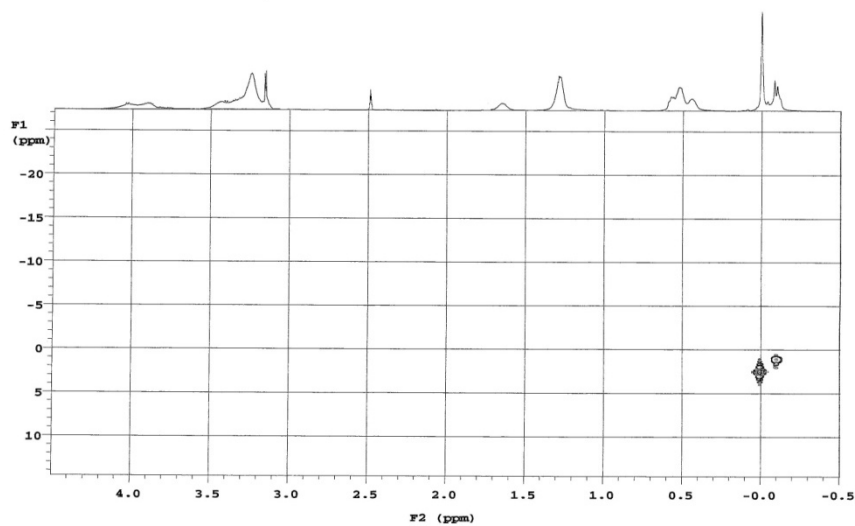

**Figure S47.** HMBC  $\{^1\text{H}-^{29}\text{Si}\}$  spectrum of  $\text{G}_3\text{-}\{[\text{Si}(\text{CH}_2\text{CH}_2\text{CH}_2)\text{N}^+(\text{Me})(\text{Et})(\text{CH}_2\text{CH}_2\text{NMe}_3)]_{16}\text{32}\Gamma\}$  (**13**) in DMSO.
